# Supplementary material for: Tunable valley-selective circular polarization in vdW multilayers consisting of inversion-symmetric monolayers
Source: Royal Society of Chemistry journal article supplement (doi:10.1039/d3tc01439h), 2023-01-01
Supplement: d3tc01439h1.pdf [file d3tc01439h1.pdf]

Supporting Information for  
Tunable valley-selective circular polarization in vdW multilayer  
consist of inversion-symmetric monolayers

Xikui Ma<sup>a</sup>, Weifeng Li<sup>b</sup>, Yangyang Li<sup>b</sup>, Xiangdong Liu<sup>b</sup>, Xian Zhao<sup>a,\*</sup>, Mingwen

Zhao<sup>b,\*</sup>

<sup>a</sup> *Center for Optics Research and Engineering of Shandong University, Shandong*

*University, Qingdao, 266237, China*

<sup>b</sup> *School of Physics, Shandong University, Jinan, Shandong, 250100, China*

---

\* Corresponding authors: Email: xianzhao@sdu.edu.cn (XZ); zmw@sdu.edu.cn (MZ)



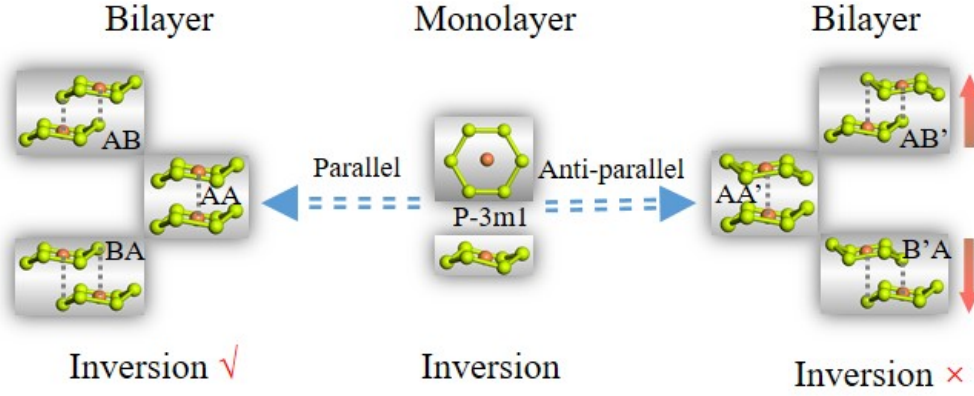

**Fig. S2** Schematic diagram of inversion symmetry monolayer with space group of P-3m1 and possible bilayer. Two monolayers parallel stacking directly without relative rotation is AA bilayer, and under the translation operation  $t(1/3, -1/3, 0)/t(1/3, 2/3, 0)/t(-2/3, -1/3, 0)$  and  $t(2/3, 1/3, 0)/t(-1/3, 1/3, 0)/t(-1/3, -2/3, 0)$  obtain the AB and BA, respectively. The parallelly-stacked bilayers keeps the inversion symmetry. Similarly, two monolayers anti-parallel stacking with  $180^\circ$  rotation is AA' bilayer, and under the translation operation  $t(1/3, -1/3, 0)/t(1/3, 2/3, 0)/t(-2/3, -1/3, 0)$  and  $t(2/3, 1/3, 0)/t(-1/3, 1/3, 0)/t(-1/3, -2/3, 0)$  obtain the AB' and B'A, respectively. The anti-parallelly-stacked bilayers breaks the inversion symmetry. The red arrows represent the interlayer electric polarization.

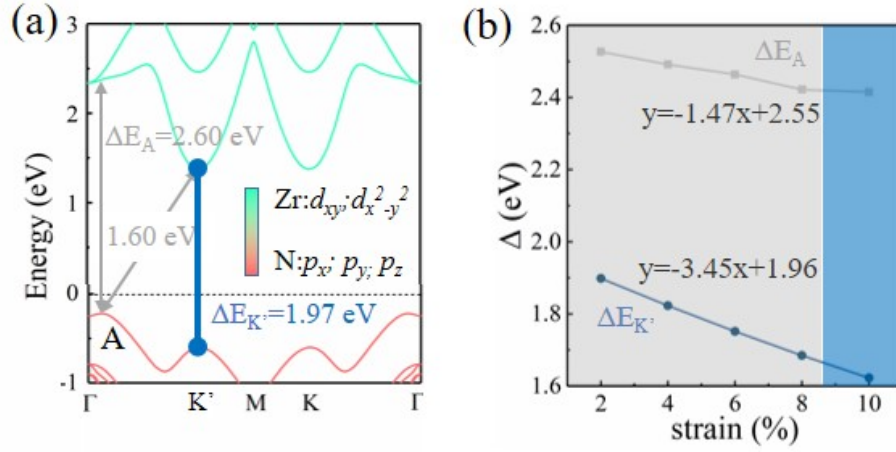

**Fig. S3** (a) Band structure of ZrNBr monolayer. The direct band gap at A and K' is  $\Delta E_{K'} = 1.97$  eV and  $\Delta E_A = 2.60$  eV, and the indirect band gap is 1.60 eV. The light blue and orange line represent the contribution of Zr ( $d_{xy}, d_{x^2-y^2}$ ) and N ( $p_x, p_y, p_z$ ). (b) The direct band gap at A and K' point as the function of biaxial strain. A direct-band-gap semiconductor was shown in blue background.

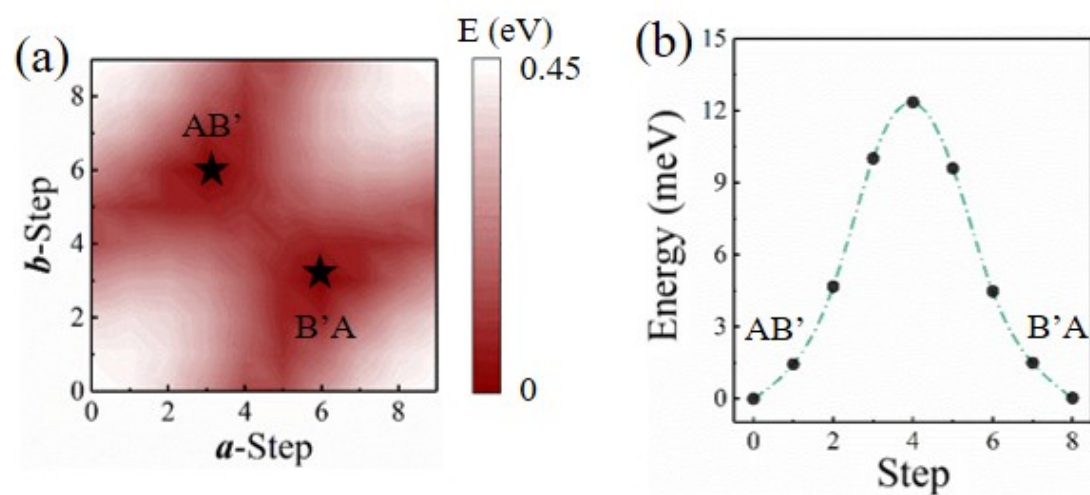

**Fig. S4** The energy profile of anti-parallelly-stacked ZrNBr bilayer with interlayer sliding along two basic vectors. (c) The potential barrier from AB' to B'A along the minimum energy path by NEB calculation.

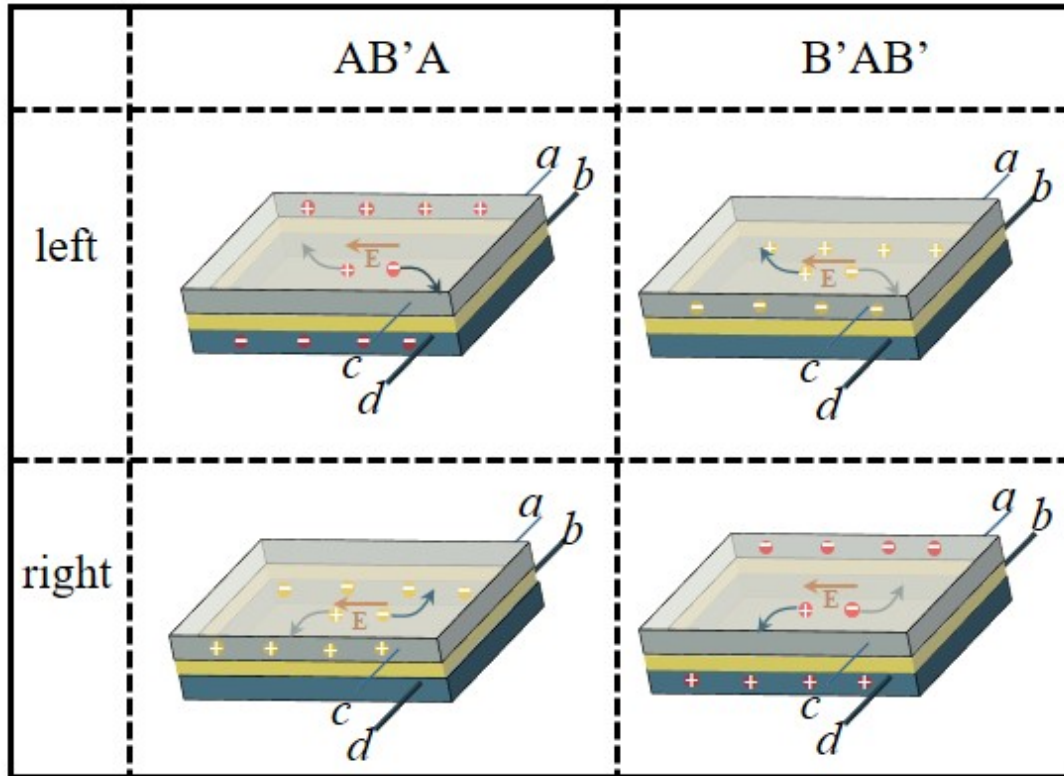

**Fig. S5** The diagram of spatial separation of electrons and holes in AB'A and B'AB' trilayers under left- (left) and right-polarized (right) light, which same as **Fig. 5**.

**Table SI** The voltage between different sides in trilayer under left- and right-polarized light. The 0 represent no voltage.

|       | AB'A  |       | B'AB' |       |
|-------|-------|-------|-------|-------|
| left  | ab=0  | cd=0  | ab=0  | cd=0  |
|       | ac=1  | bd=1  | ac=1  | bd=1  |
| right | ab=0  | cd=0  | ab=0  | cd=-0 |
|       | ac=-1 | bd=-1 | ac=-1 | bd=-1 |
